# Supplementary material for: Spinal cord precursors utilize neural crest cell mechanisms to generate hybrid peripheral myelinating glia
Source: eLife journal article supplement (doi:10.7554/elife.64267), 2021-02-08
Supplement: supp [file elife-64267-supp-v1.zip]

Archive with 29 entries (29 files):
- elife_poa_e64267_Video_1.mp4
- elife_poa_e64267_Video_2.mp4
- elife_poa_e64267_Video_3.mp4
- elife_poa_e64267_Video_4.mp4
- elife_poa_e64267_Video_5.mp4
- elife_poa_e64267_Video_6.mp4
- elife_poa_e64267_Video_7.mp4
- elife_poa_e64267_Transparent_Reporting_File.docx
- elife_poa_e64267_Figure_1_figure_supplement_1.pdf
- elife_poa_e64267_Figure_1_figure_supplement_2.pdf
- elife_poa_e64267_Figure_1_figure_supplement_3.pdf
- elife_poa_e64267_Figure_2_figure_supplement_1.pdf
- elife_poa_e64267_Figure_3_figure_supplement_1.pdf
- elife_poa_e64267_Figure_3_figure_supplement_2.pdf
- elife_poa_e64267_Figure_5_figure_supplement_1.pdf
- elife_poa_e64267_Figure_6_figure_supplement_1.pdf
- elife_poa_e64267_Figure_6_figure_supplement_2.pdf
- elife_poa_e64267_Figure_7_figure_supplement_1.pdf
- elife_poa_e64267_Figure_8_figure_supplement_1.pdf
- elife_poa_e64267_Figure_8_figure_supplement_2.pdf
- elife_poa_e64267_Figure_1_source_data_1.xlsx
- elife_poa_e64267_Figure_1_figure_supplement_1_source_data_1.xlsx
- elife_poa_e64267_Figure_1_figure_supplement_2_source_data_1.xlsx
- elife_poa_e64267_Figure_3_source_data_1.xlsx
- elife_poa_e64267_Figure_4_source_data_1.xlsx
- elife_poa_e64267_Figure_5_source_data_1.xlsx
- elife_poa_e64267_Figure_5_figure_supplement_1_source_data.xlsx
- elife_poa_e64267_Figure_8_source_data_1.xlsx
- elife_poa_e64267_Figure_8_figure_supplement_2_source_data.xlsx
