# Supplementary material for: Spinal cord precursors utilize neural crest cell mechanisms to generate hybrid peripheral myelinating glia
Source: eLife journal article supplement (doi:10.7554/elife.64267), 2021-02-08
Supplement: supp [file elife-64267-supp-v1.zip › elife_poa_e64267_Figure_1_figure_supplement_1_source_data_1.xlsx]

## Sheet: Sheet1
Figure 1 figure supplement 1B
MEP glia	Perineurial glia
100	0
100	0
0	100
100	0
100	0
100	0
100	0
100	0
0	100
100	0
0	100
0	100
100	0
100	0
100	0
100	0
0	100
100	0
100	0
100	0
100	0
100	0
100	0
0	100
100	0
100	0
100	0
100	0
100	0
100	0
100	0
100	0
0	100
0	100
0	100
100	0
100	0
100	0
80	20
100	0
100	0
100	0
100	0
100	0
100	0
100	0
100	0
100	0
100	0
100	0
50	50
75	25
