# Supplementary material for: Spinal cord precursors utilize neural crest cell mechanisms to generate hybrid peripheral myelinating glia
Source: eLife journal article supplement (doi:10.7554/elife.64267), 2021-02-08
Supplement: supp [file elife-64267-supp-v1.zip › elife_poa_e64267_Figure_1_figure_supplement_2_source_data_1.xlsx]

## Sheet: tab1
Figure 1 figure supplement 2C
	nkx2.2anlsegfp fluorescence
	48 hpf	14573	14308	13726	16504	13037	11932	13039	11308	7700	18335	19197	14942	11625
	50 hpf	17523	11424	16656	13784	12394	7829	7670	10333	6718	10648	10176	11111	14832	13208	7518	7226	9206	12388	9378	14288	9577	13252	12170	10797	30209	25319
	55 hpf	12241	7657	4524	5862	7398	8092	6706	11693	9367	13165	8924	11251	14251	5775	7652	7072	5674	9445	12811	12089	11111	17827	10831	12918	27861
	72 hpf	7752	8730	3991	2856	6217	4930	11571	10512	8525	13078	7969	7563	13167	17105	11298	13553	10002	8532	8733	9082	17695	19483	6190	5866	8481	16699	13530	19211	6613	5925	6939
	olig2egfp fluorescence
	48 hpf	12144	7504	7177	8510	8355	6418	7437	7029	7187	6131	7225	8496	11740	7004	9054	4939	6576	7583	6803	4471	4758	8604	6838	4513	9100	6017	7104
	50 hpf	1863	3276	1854	4977	7406	3676	4583	2958	3088	4042	5453	2322	3362	1730	2883	3387	1641	3356	2941	4566	4114	4465	7073	1753	4239	5835	2077
	55 hpf	757	1556	3106	2030	1510	2622	1193	724	695	1770	1442	2102	1218	5020	1130	1194	1962	3458	4294	1814	6202	2867	3034	2322
	72 hpf	313	235	3042	548	1514	1334	817	1696	902	2021	2631	1827	1167	1479	766	650	428	701	182	755
			nkx2.2a:nls-eGFP			olig2:eGFP
			Mean	SEM	N	Mean	SEM	N
	48 hpf		1	0.0510674	13	1	0.0371465	27
	50 hpf		0.919667	0.0641641	26	0.617547	0.0310151	27
	55 hpf		0.792262	0.0594843	25	0.4711	0.0303353	24
	72 hpf		0.757135	0.0499169	31	0.356414	0.0191734	20
