# Supplementary material for: Spinal cord precursors utilize neural crest cell mechanisms to generate hybrid peripheral myelinating glia
Source: eLife journal article supplement (doi:10.7554/elife.64267), 2021-02-08
Supplement: supp [file elife-64267-supp-v1.zip › elife_poa_e64267_Figure_1_source_data_1.xlsx]

## Sheet: Sheet1
Figure 1H olig2egpf fluorescence				Figure 1I nkx2.2a:nls-egpf fluorescence
OPCs	pMN domain cells	MEP glia		OPCs	lateral floor plate cells	MEP glia
58989.3	39393.6	5888.66		25083.3	30054.2	22713.3
62603.4	36068.7	5941.12		10162.5	10360.4	42294.7
42921.4	31113.6	5451.88		24543.3	16821	14340
56567.2	26708.7	4573.87		13338.1	25157.6	22198
52515.4	23265	6838.26		17831.1	20368.2	24944.4
56765.1	23156.4	6104.4		18358.9	21691.5	29589.5
43756.6	13906.8	6039.44		9809.21	20160.1	25182.9
45653.3	16479.4	8255.08		29744.8	23993.6	33750.9
60568.8	24047.9	6989.75		42022.3	29567.5	26289.6
50871.6	27162.9	7166.76		23519.1	32217.4	27393.2
40490.2	21248.9	6480.94		22102.2	17063.5	34055.3
32813.3	25805.9	6024.44		26746.4	26479.5	29865.8
61400.6	29427.6	3468.11		29843.7	24475.5	29921.3
34260.4	28698.6	11072.6		24673.7	31659.6	33921.2
57047.6	29624.4	10680.8		26592.6	33409.6	34938.2
58590	32169.1	7757.97		23329.6	21309.4	26219.6
62281.7	37217.6	11570.5
61419.3	29142.5	10712.1
62248.1	45260.8	8074.5
59095.9	22565.5	8648.82
60211.6	36650.7	9193.2
61939.4	42912.7	7729.81
62836.8	43742.8	7012.45
60969.6	30841.3	4650.13
52485.9	35722.3	5452.67
62831.6	22595.4	4411.53
60582.2	33727.4	7877.14
54881.3	29482.3	6096.9
