# Supplementary material for: Spinal cord precursors utilize neural crest cell mechanisms to generate hybrid peripheral myelinating glia
Source: eLife journal article supplement (doi:10.7554/elife.64267), 2021-02-08
Supplement: supp [file elife-64267-supp-v1.zip › elife_poa_e64267_Figure_3_source_data_1.xlsx]

## Sheet: Figure 3C
Figure 3- source data 1
Figure 3C
control	foxd3 -/-
100	0
100	0
100	0
100	0
100	0
100	0
100	0
100	0
100	0
100	0
	0
	0
	0
	0
	0
	0
	0
	0
	0
	0
	0
	0
	0
	0
	0
	0
	0

## Sheet: Figure 3D
Figure 3D
control	foxd3 -/-
0	4
0	10
0	11
0	17
0	24
0	19
0	9
0	18
0	14
0	12
0	15
1	11
0	7
0	9
0	2
	7
	12
	7
	14
	11
	23
	21
	15
	24
	19
	25
	20

## Sheet: Figure 3G
		%
	foxd3	66.666
	sox10	8.333
	foxd3/sox10	25

## Sheet: Figure 3I
control	foxd3 mRNA
0	1
1	1
0	1
0	0
0	0
0	0
1	0
0	0
1	0
0	0
0	0
0	0
0	0
1	1
0	1
0	1
0	1
0	2
0	1
0	1
1	0
0	0
0	0
0	0
0	1
0	1
0	0
0	1
0	0
0	0
0	1
0	0
0	0
0	1
0	1
1	2
0	0
0	0
0	0
0	1
0	0
0	1
0	0
0	1
0	0
0	0
0	0
0	0
0	1
0	0
0	1
0	0
0	0
0	0
0	1
0	1
0	0
0	2
0	2
0	1
0	0
0	1
0	1
0	0
0	0
0	1
0	0
0	0
0	1
0	3
0	0
0	1
0	0
0	0
0	2
0	0
	0
	1
