# Supplementary material for: Spinal cord precursors utilize neural crest cell mechanisms to generate hybrid peripheral myelinating glia
Source: eLife journal article supplement (doi:10.7554/elife.64267), 2021-02-08
Supplement: supp [file elife-64267-supp-v1.zip › elife_poa_e64267_Figure_4_source_data_1.xlsx]

## Sheet: Figure 4B
GM6001
along motor nerves	in the spinal cord	absent
1	9	6
1	10	4
2	7	11
0	4	3
2	5	3
control
along motor nerves	in the spinal cord	absent
8	2	0
8	3	0
10	1	0
12	0	0
10	0	0
14	0	0

## Sheet: Figure 4C
GM6001
along motor nerves	in the spinal cord	absent
7	3	1
4	3	4
2	6	4
3	5	3
2	8	1
4	8	2
control
along motor nerves	in the spinal cord	absent
10	0	0
10	0	0
10	0	0
10	0	0
10	0	0
10	0	0
10	0	0
