# Supplementary material for: Spinal cord precursors utilize neural crest cell mechanisms to generate hybrid peripheral myelinating glia
Source: eLife journal article supplement (doi:10.7554/elife.64267), 2021-02-08
Supplement: supp [file elife-64267-supp-v1.zip › elife_poa_e64267_Figure_5_figure_supplement_1_source_data.xlsx]

## Sheet: Fig5 figure supplement 1C
raw data				%
EdU+	total
3	3			100
2	4			50
4	4			100
3	3			100
2	2			100
0	1			0
1	1			100
2	2			100
1	3			33.3333
3	5			60
2	2			100
2	2			100
2	2			100
1	2			50
3	3			100
2	2			100
2	2			100
2	3			66.6667
1	2			50
2	2			100
2	2			100
2	2			100
2	3			66.6667
1	2			50
2	3			66.6667
2	3			66.6667
3	3			100
0	2			0
0	2			0
3	4			75
4	4			100
1	2			50
1	3			33.3333
3	4			75

## Sheet: Fig5 figure supplement 1D
	# of MEP glia
	3
	4
	2
	4
	2
	2
	3
	3
	3
	5
	2
	2
	3
	2
	3
	2
	3
	4
	3
	5
	4
	5
	5
	6
	3
	4
	4
	5
	4
	5
	4
	3
	6
	5
	4
	4
	5
	3
	4
	4
	3
	5
	3
	4
	4
	4
	3
	4
	3
	3
	4
	5
	3
	3
	3
	3
	4
	2
	4
