# Supplementary material for: Spinal cord precursors utilize neural crest cell mechanisms to generate hybrid peripheral myelinating glia
Source: eLife journal article supplement (doi:10.7554/elife.64267), 2021-02-08
Supplement: supp [file elife-64267-supp-v1.zip › elife_poa_e64267_Figure_5_source_data_1.xlsx]

## Sheet: Figure 5C
	% red	% green	% blue
nerve 1	38.6	48.68	84.12
	33.03	52.57	73.82
	32.47	56.7	77.58
	33.88	54.57	69.96
	31.49	51.42	82.51
	32.32	55.27	83.69
nerve 2	31.45	62.93	61.27
	29.92	62.25	68.78
	42.64	75.23	61.27
	28.1	51.4	67.49
nerve 3	15.67	41.63	38.31
	18.42	53.79	45.99
	17.58	39.41	39.41
	17.87	36.85	37.53
	14.61	31.82	34.63
	14.8	25.72	40.18

## Sheet: Figure 5D
# MEP glial division
1
1
2
3
2
2
1
3
2
3
3
2
2
1
1
3
1
3
4
4
3
2
3
1
2
2
2

## Sheet: Figure 5F
control	aphidicolin + HUA
2	1
2	1
2	1
2	0
3	1
3	1
1	0
2	1
2	1
2	1
4	0
3	1
2	1
4	1
2	1
2	1
2	1
2	1
4	1
3	1
2	1
3	1
3	1
2	1
1	1
2	1
4	1
6	1
3	1
3	0
3	1
1	1
5	1
4	1
2	1
3	1
2	1
3	1
4	0
3	1
5	1
3	1
2	1
2	1
5	1
6	1
2	1
2	1
3	1
2	1
2	1
1	1
2	1
4	1
3	1
3	1
2	2
3	1
3	1
2	1
3	0
2	0
3	1
5	1
3	1
4	1
2	1
2	1
4	1
3	0
4	1
3	1
3	1
3	1
5	1
2	1
2	1
2	1
3	1
	1
	0
	1
	1
	1
	0
	1
	1
	1
	1
