# Supplementary material for: Spinal cord precursors utilize neural crest cell mechanisms to generate hybrid peripheral myelinating glia
Source: eLife journal article supplement (doi:10.7554/elife.64267), 2021-02-08
Supplement: supp [file elife-64267-supp-v1.zip › elife_poa_e64267_Figure_8_figure_supplement_2_source_data.xlsx]

## Sheet: Figure 8B
control	neuroD:gal4;UAS:hNrg1
2	3
2	2
4	2
0	3
0	1
0	0
3	3
2	0
2	2
0	1
0	2
2	7
4	2
4	2
0	2
0	4
3	2
0	3
3	3
3	3
2	3
3	3
2	4
1	3
1	3
2	3
3	3
0	3
1	4
0	5
1	5
2	4
2	2
1	3
1	3
2	3
0	2
3	7
1	2
1	5
3	4
2	2
1	1
2	2
1	1
2	1
2	4
3	0
3	2
3	1
2	2
3	3
3	1
2	3
3	3
1	3
1	2
1	3
	2
	3
	4
	3

## Sheet: Figure 8C
control	neuroD:gal4;UAS:hNrg1
2	3
2	4
4	4
3	4
2	2
1	2
3	4
3	4
3	2
1	1
3	3
2	7
4	4
4	3
1	5
1	4
3	2
3	6
3	3
3	3
2	3
3	3
2	4
2	6
2	4
4	3
3	5
1	4
2	4
1	5
2	5
3	4
2	2
3	3
2	3
2	4
2	2
4	7
1	2
3	5
3	5
2	3
2	3
2	4
3	4
2	4
2	4
3	1
3	3
3	2
3	3
3	3
3	2
2	5
5	3
2	3
2	4
2	3
	2
	3
	4
	3
