# Supplementary material for: Spinal cord precursors utilize neural crest cell mechanisms to generate hybrid peripheral myelinating glia
Source: eLife journal article supplement (doi:10.7554/elife.64267), 2021-02-08
Supplement: supp [file elife-64267-supp-v1.zip › elife_poa_e64267_Figure_8_source_data_1.xlsx]

## Sheet: Figure 8C
control	neuroD:gal4;UAS:hNrg1typeIII
0	0
1	2
0	1
0	1
0	2
0	0
0	1
0	0
0	3
0	4
1	1
0	2
	0
	0
	0
	1
	0
	4
	3
	1

## Sheet: Figure 8E
control	neuroD:gal4;UAS:hNrg1typeIII
0	0
1	2
0	1
0	0
1	1
0	1
1	1
0	0
0	3
0	1
1	1
1	1
0	1
0	2
1	5
0	0
0	2
	0
