# Supplementary figures and images for: Spinal cord precursors utilize neural crest cell mechanisms to generate hybrid peripheral myelinating glia
Source: eLife journal article supplement (doi:10.7554/elife.64267), 2021-02-08

*krox20*

GFAP

merge

control

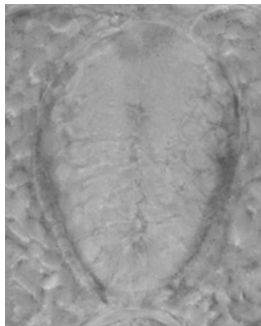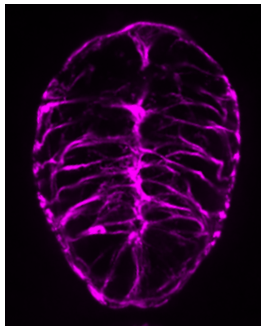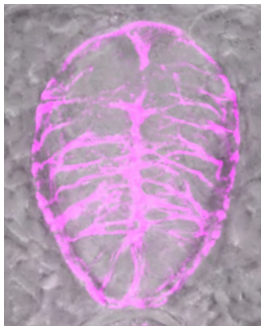

*neuroD:Gal4;  
UAS:hNrg1*

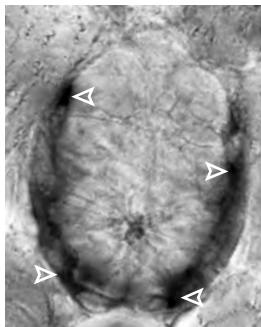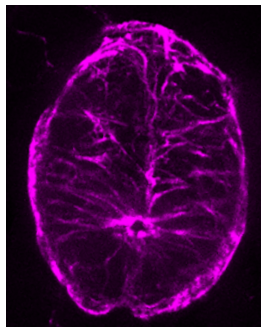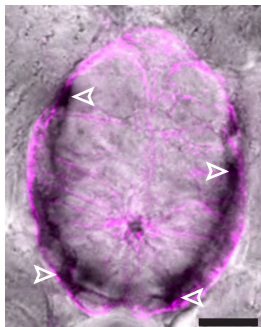

Supplement: supp [file elife-64267-supp-v1.zip]

**A**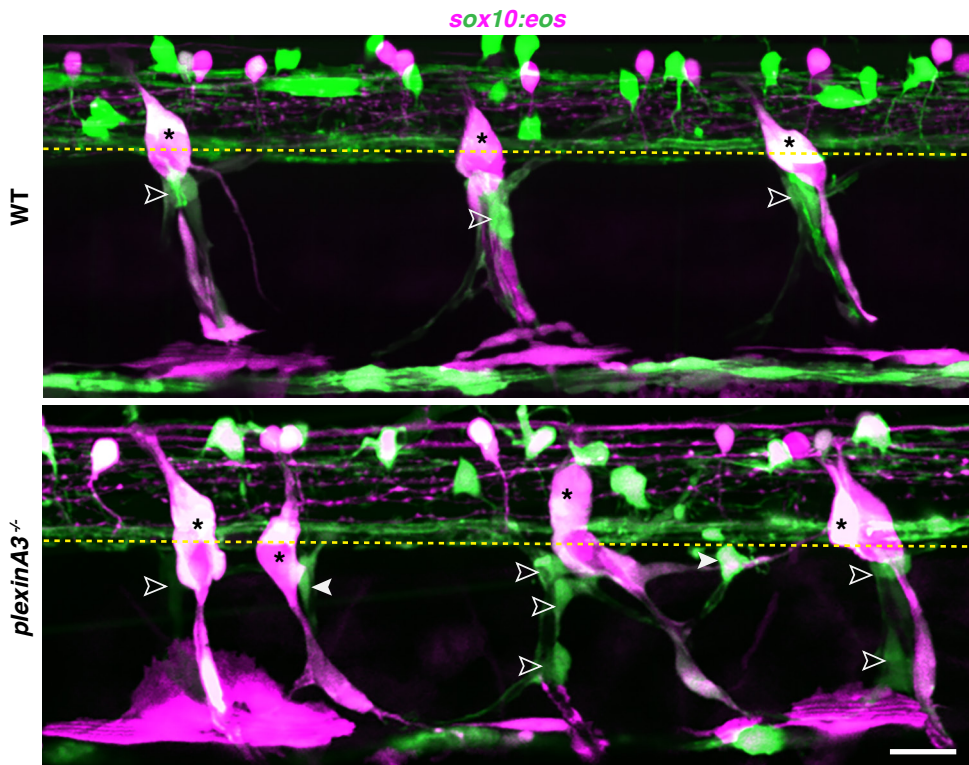**B**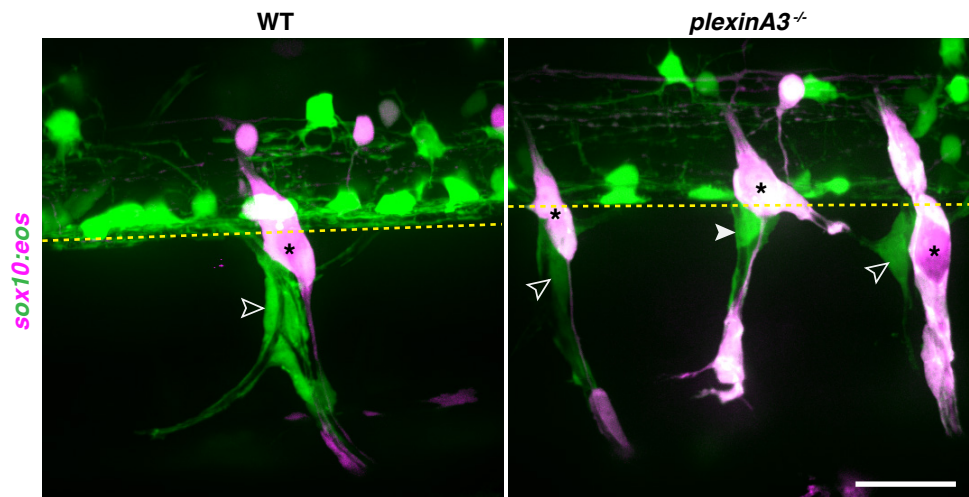

Supplement: supp [file elife-64267-supp-v1.zip]

**A**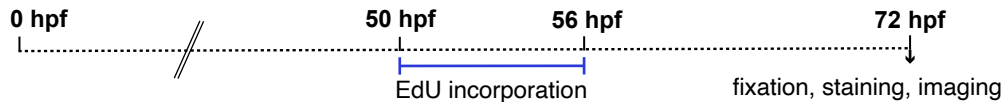**B**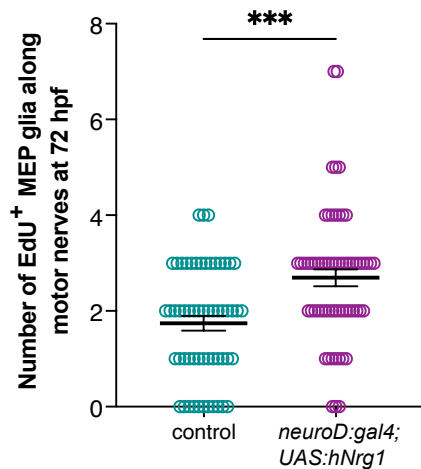**C**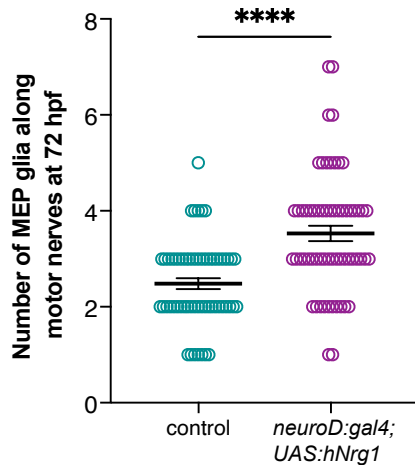

Supplement: supp [file elife-64267-supp-v1.zip]

**A**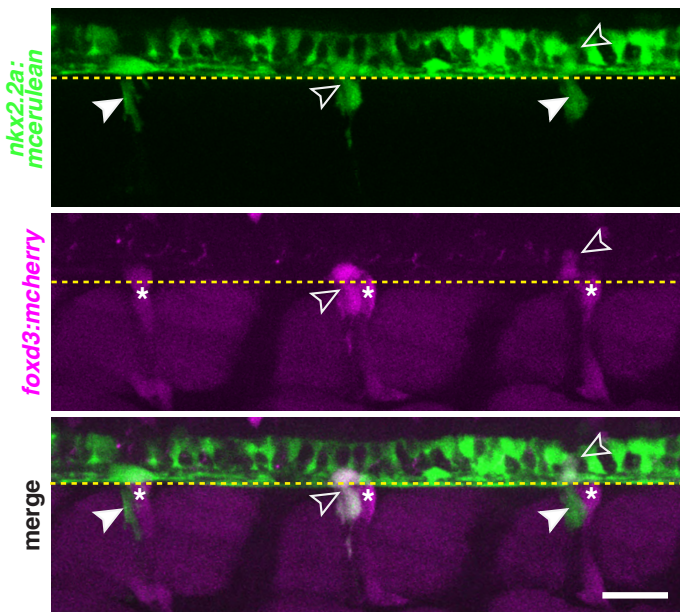**B**

First *nkx2.2a*<sup>+</sup> cell exiting the neural tube at the MEP between 48 and 50 hpf

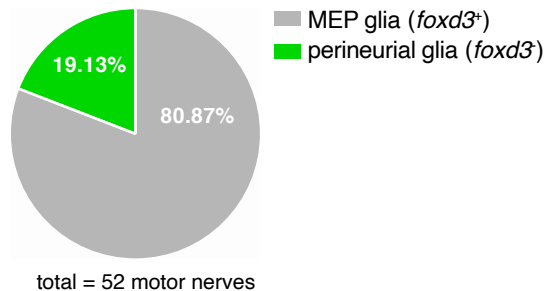**C**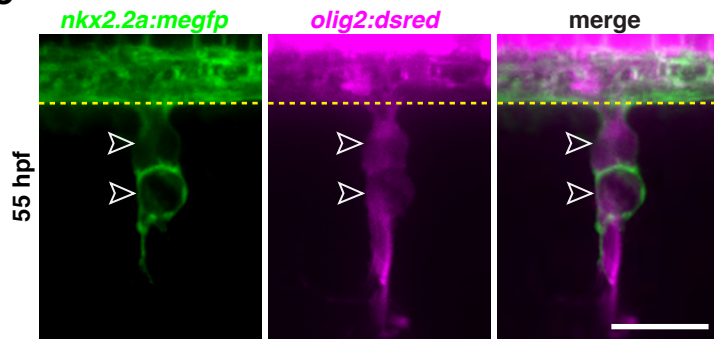**D**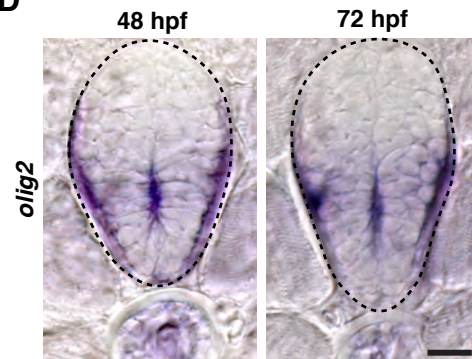

Supplement: supp [file elife-64267-supp-v1.zip › elife_poa_e64267_Figure_1_figure_supplement_1.pdf]

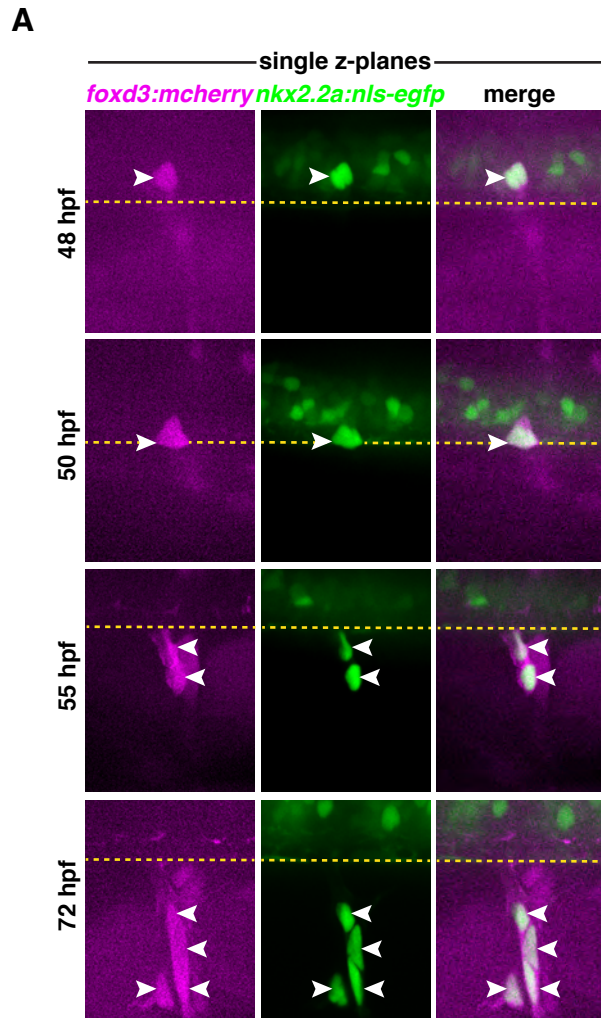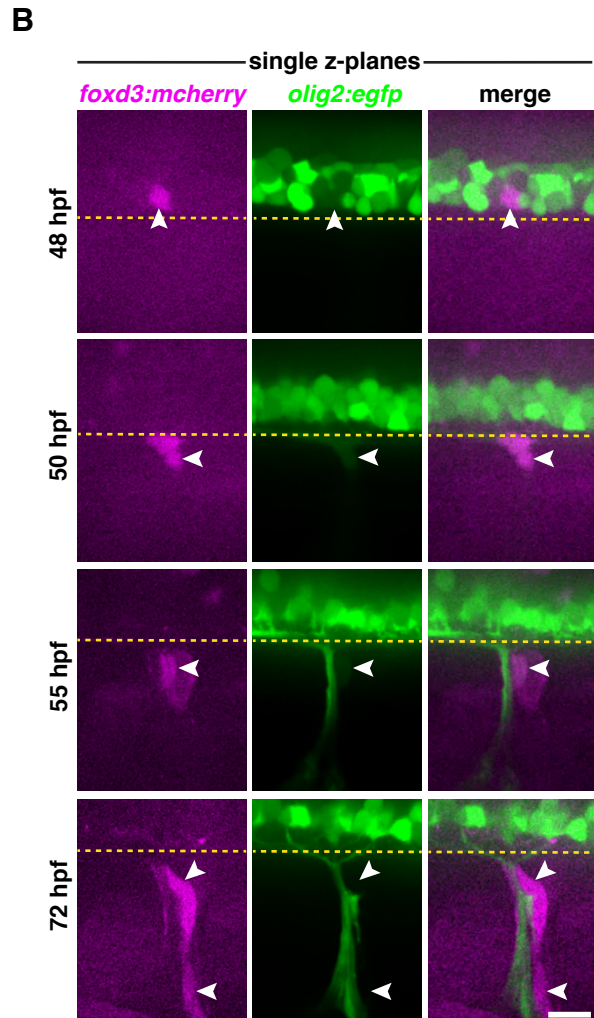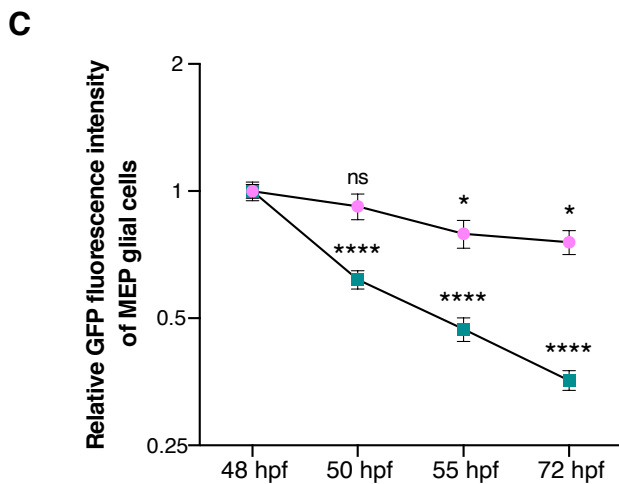

Supplement: supp [file elife-64267-supp-v1.zip › elife_poa_e64267_Figure_1_figure_supplement_2.pdf]

*olig2:egfp**nkx2.2a:nls-mcherry*

merge

24 hpf

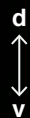

30 hpf

36 hpf

48 hpf

72 hpf

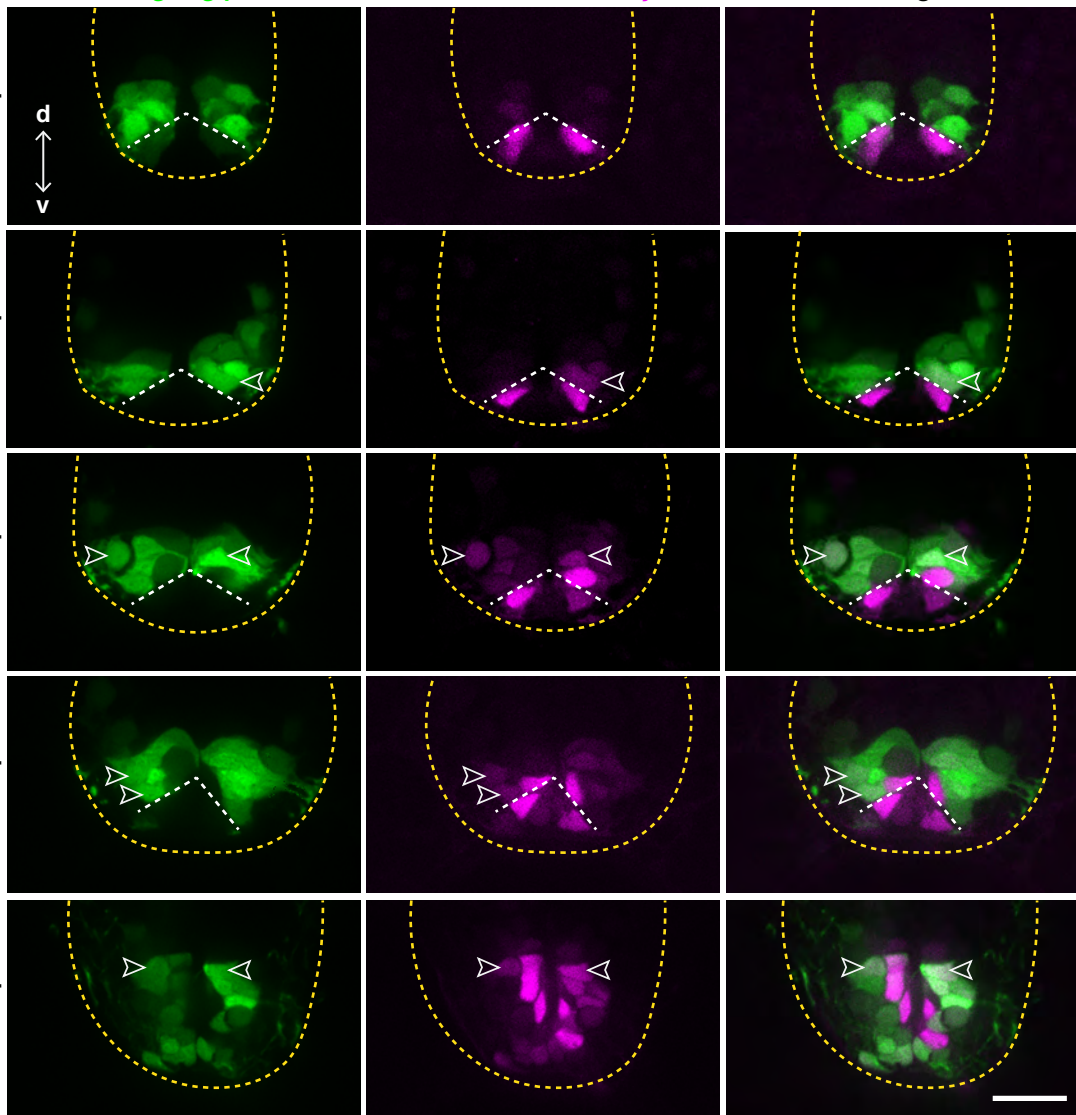

Supplement: supp [file elife-64267-supp-v1.zip › elife_poa_e64267_Figure_1_figure_supplement_3.pdf]

*foxd3:mcherry*

*olig2:egfp*

merge

48 hpf

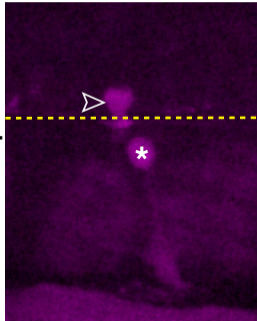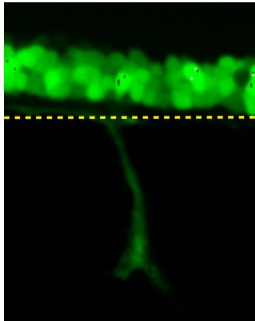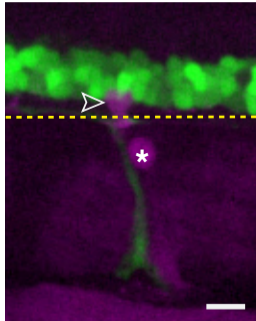

Supplement: supp [file elife-64267-supp-v1.zip › elife_poa_e64267_Figure_2_figure_supplement_1.pdf]

**A**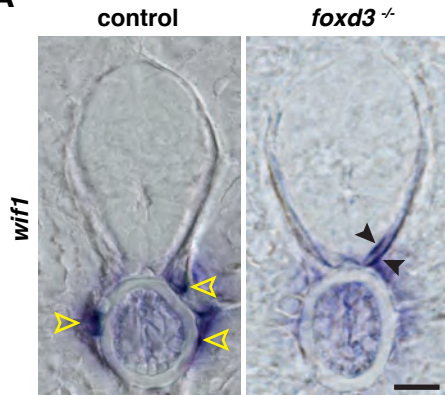**B**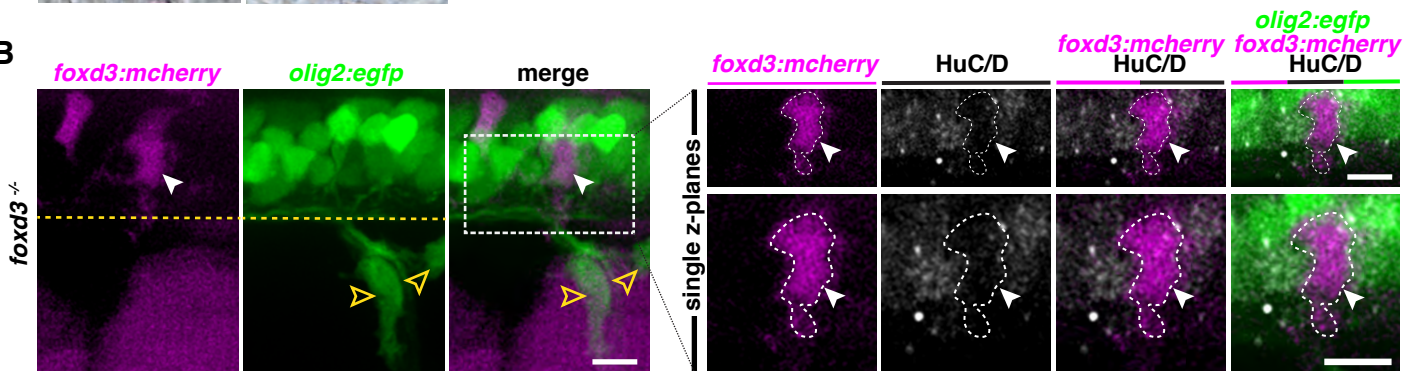

Supplement: supp [file elife-64267-supp-v1.zip › elife_poa_e64267_Figure_3_figure_supplement_1.pdf]

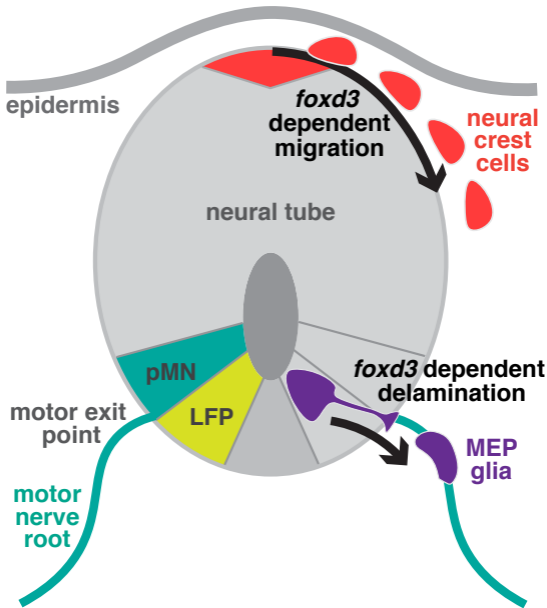

Supplement: supp [file elife-64267-supp-v1.zip › elife_poa_e64267_Figure_3_figure_supplement_2.pdf]

**A**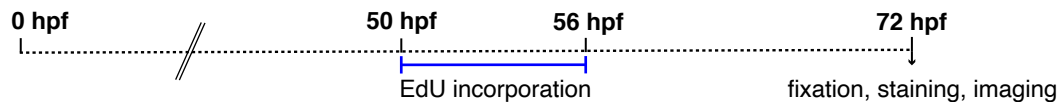**B**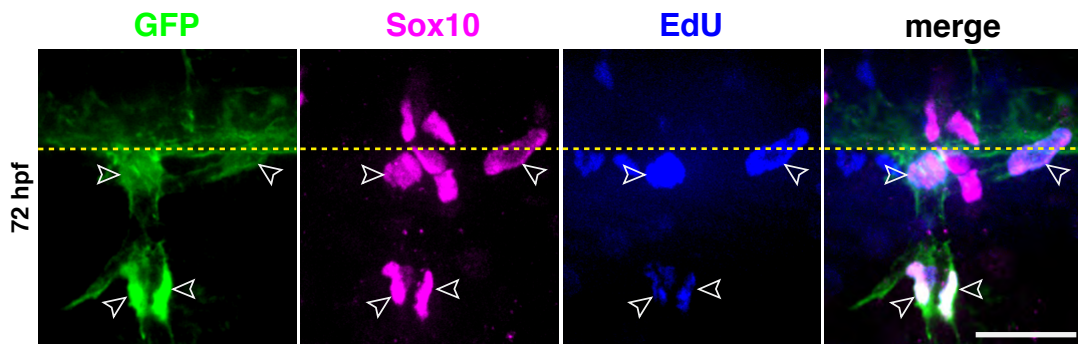**C**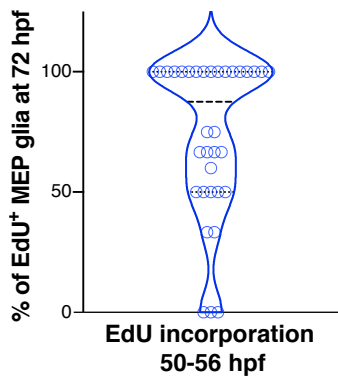**D**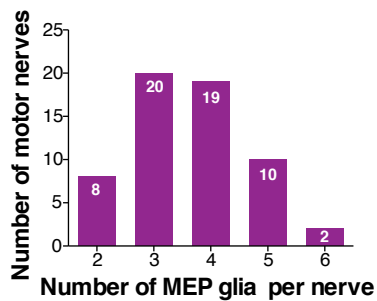**E**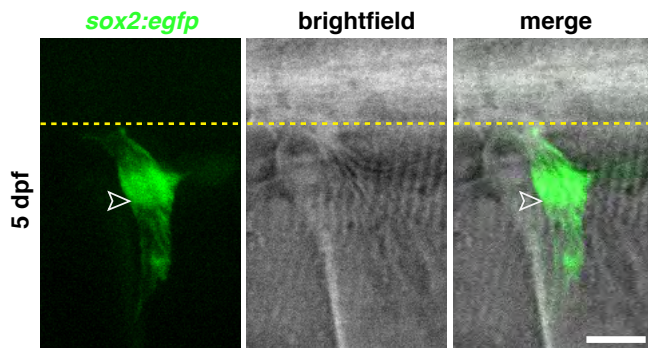

Supplement: supp [file elife-64267-supp-v1.zip › elife_poa_e64267_Figure_5_figure_supplement_1.pdf]

**A**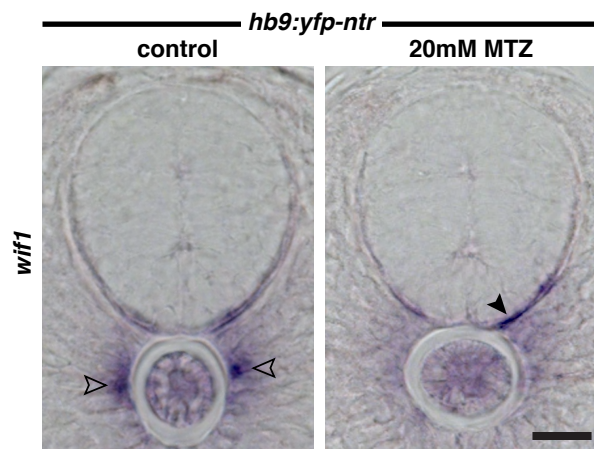**B**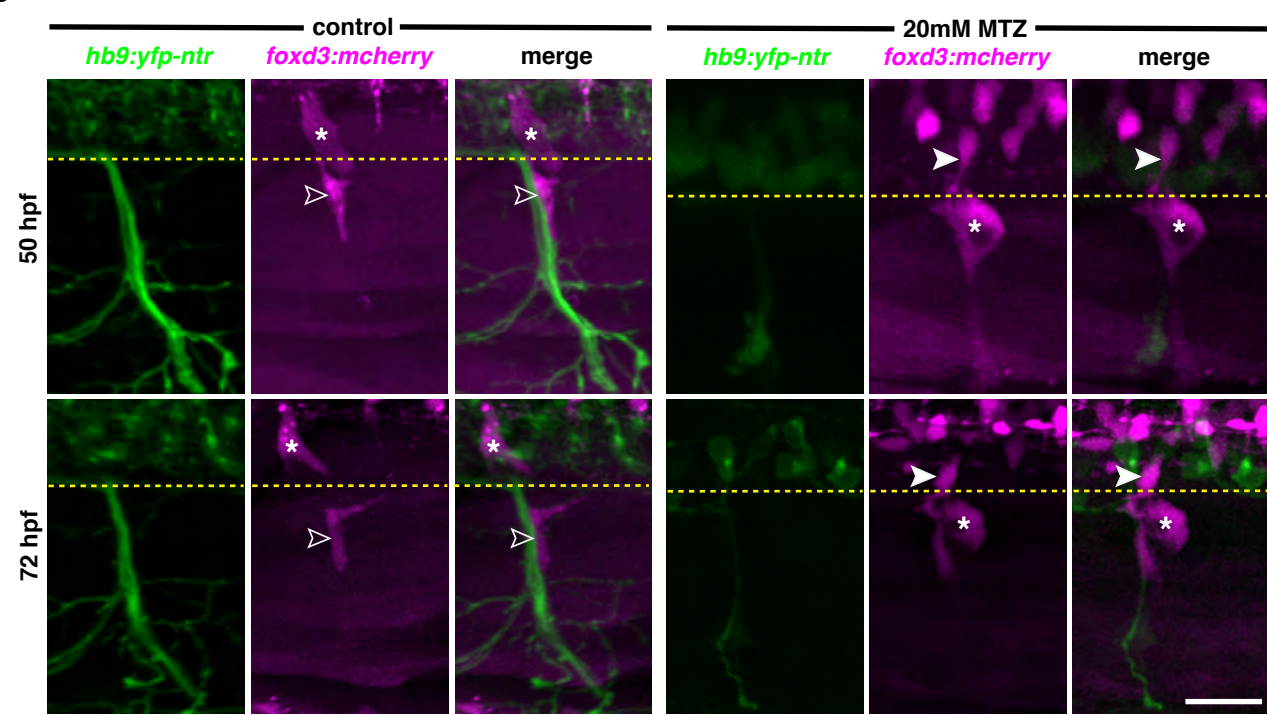

Supplement: supp [file elife-64267-supp-v1.zip › elife_poa_e64267_Figure_6_figure_supplement_2.pdf]

**A**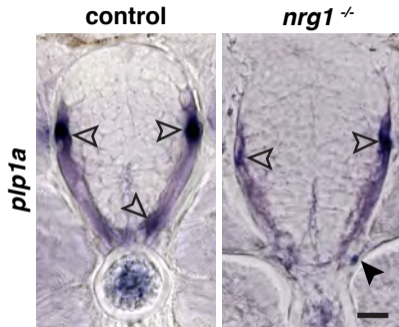**B**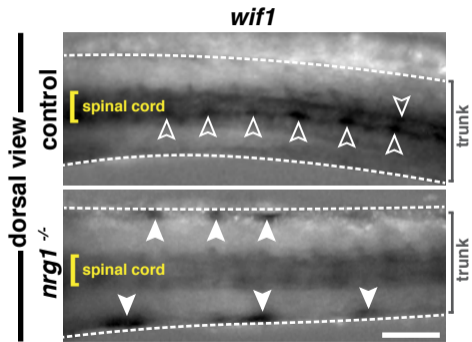

Supplement: supp [file elife-64267-supp-v1.zip › elife_poa_e64267_Figure_7_figure_supplement_1.pdf]
